# Supplementary material for: Concomitant pyroptotic and apoptotic cell death triggered in macrophages infected by Zika virus
Source: PubMed Central journal article supplement (PMC9022797; doi:10.1371/journal.pone.0257408), 2022-04-21
Supplement: pone.0257408.s004.pdf [file pone.0257408.s004.pdf]

# Figure 1G

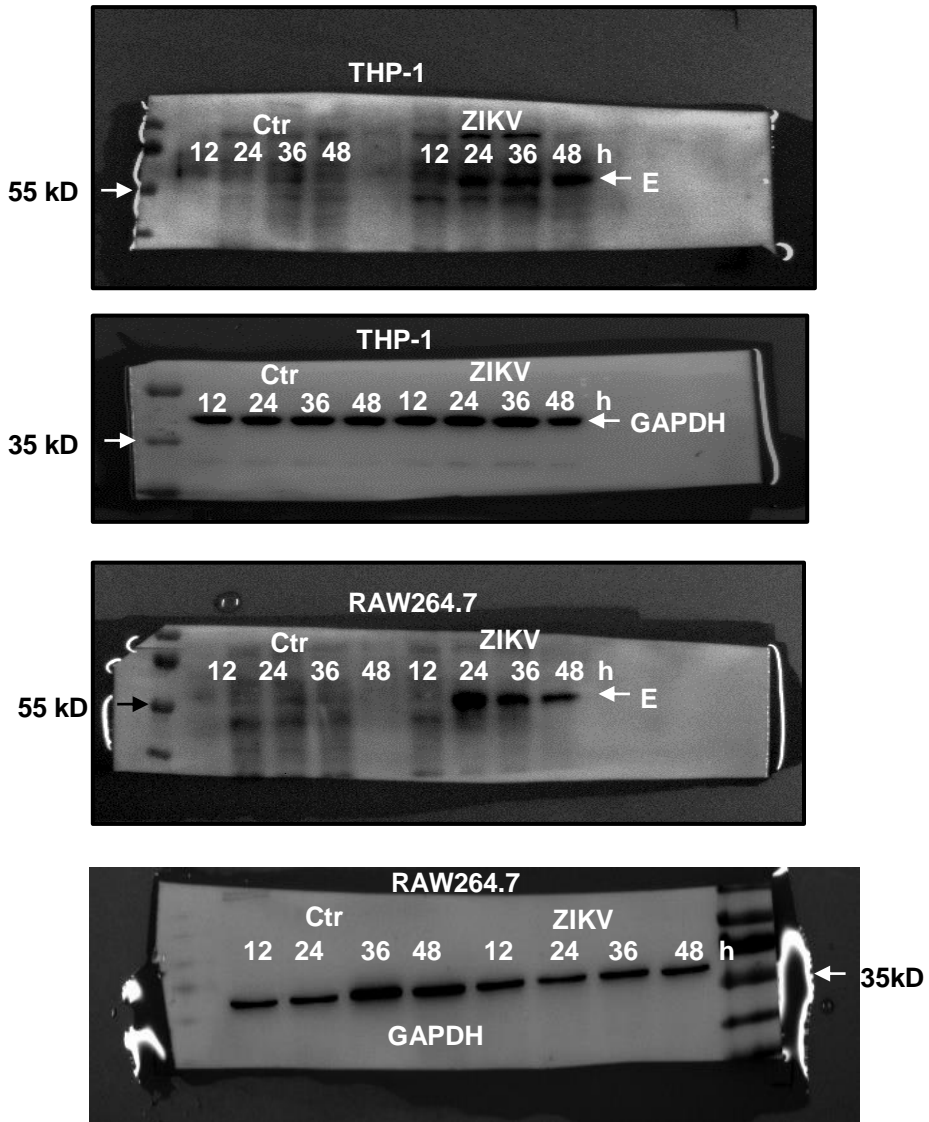

# Figure 3C

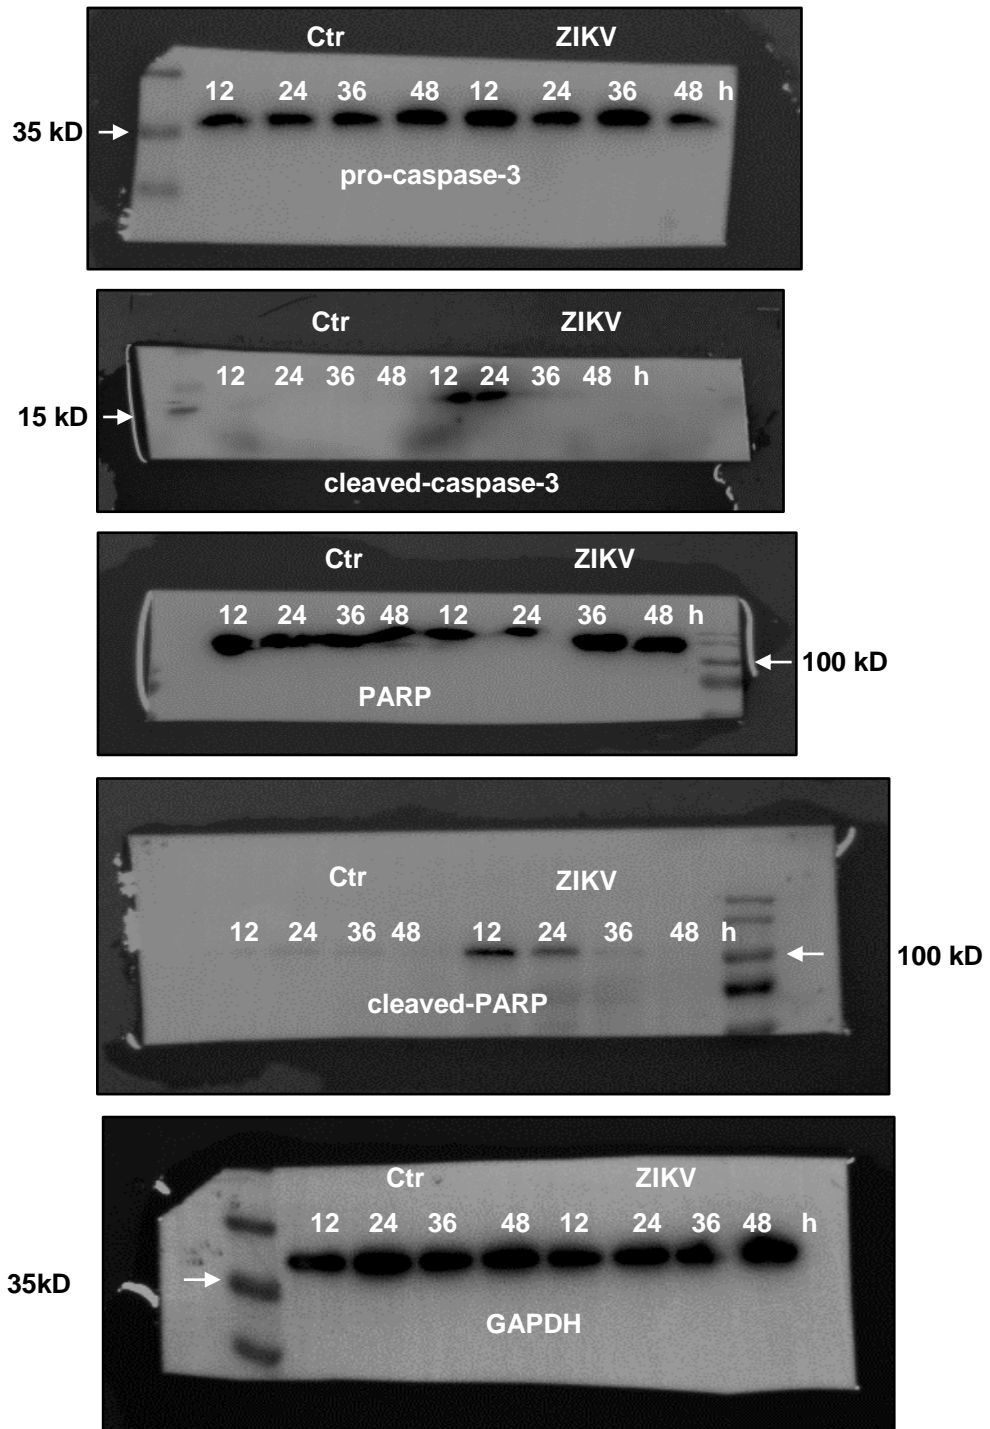

# Figure 3D

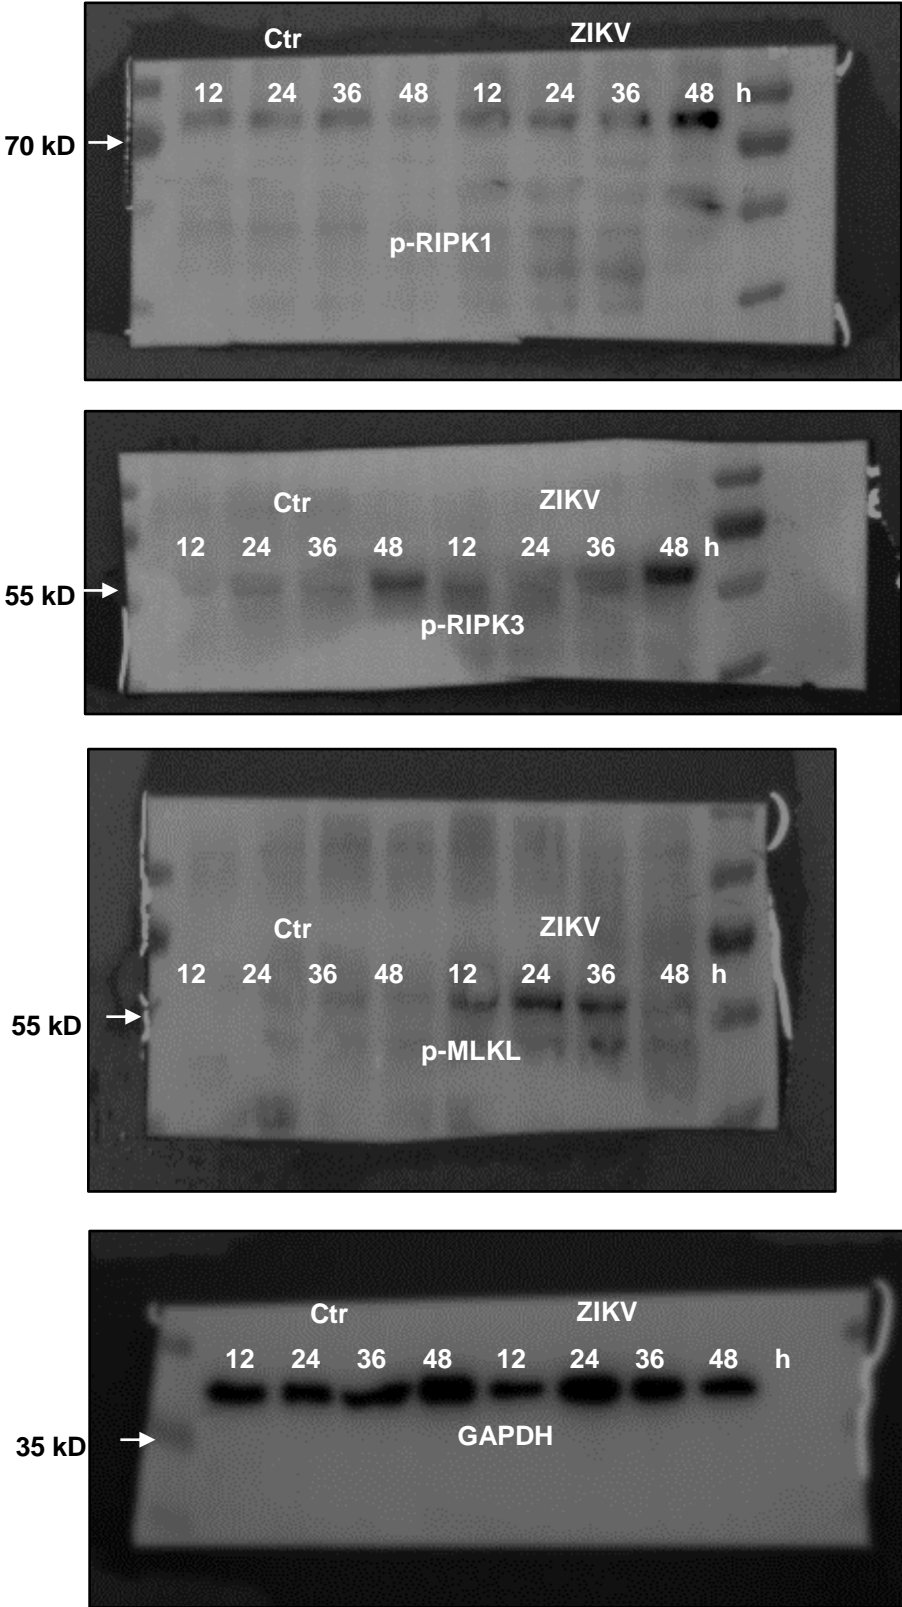

# Figure 6A

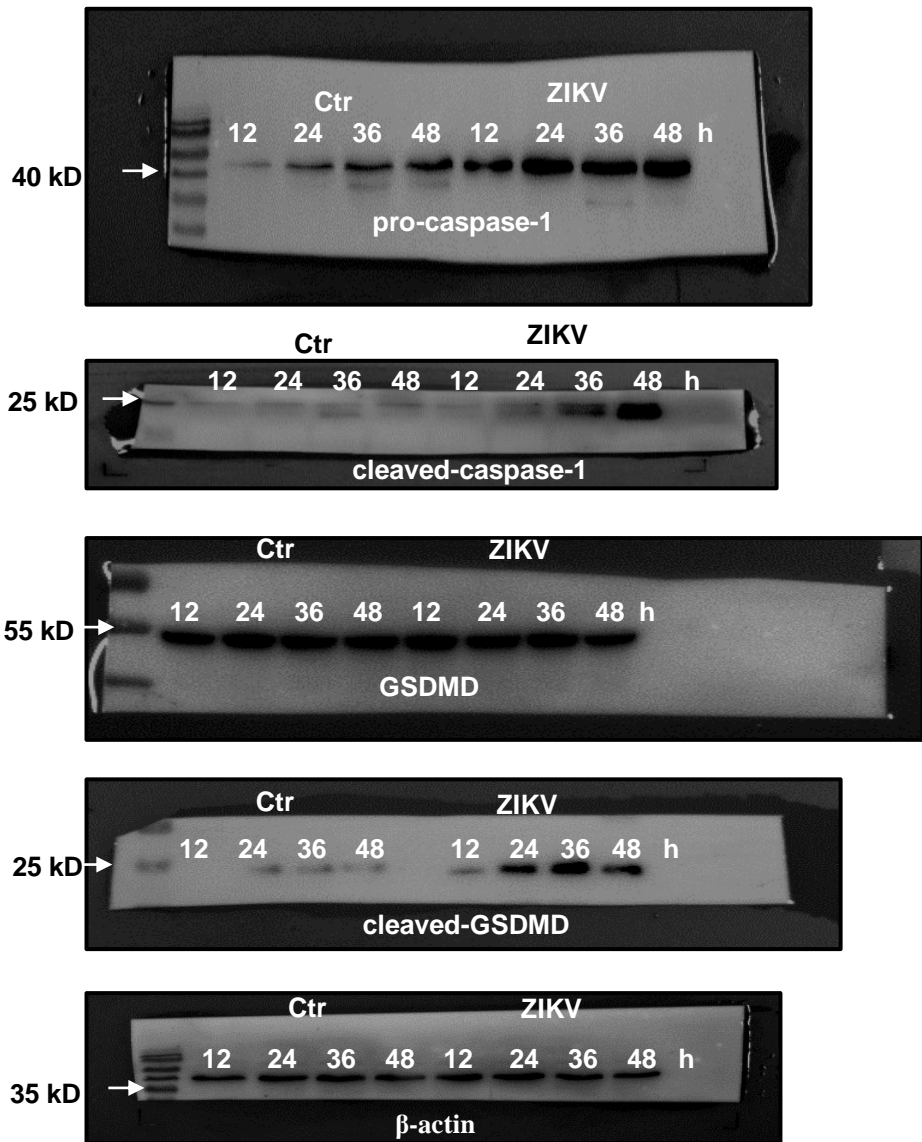

# Figure 6B

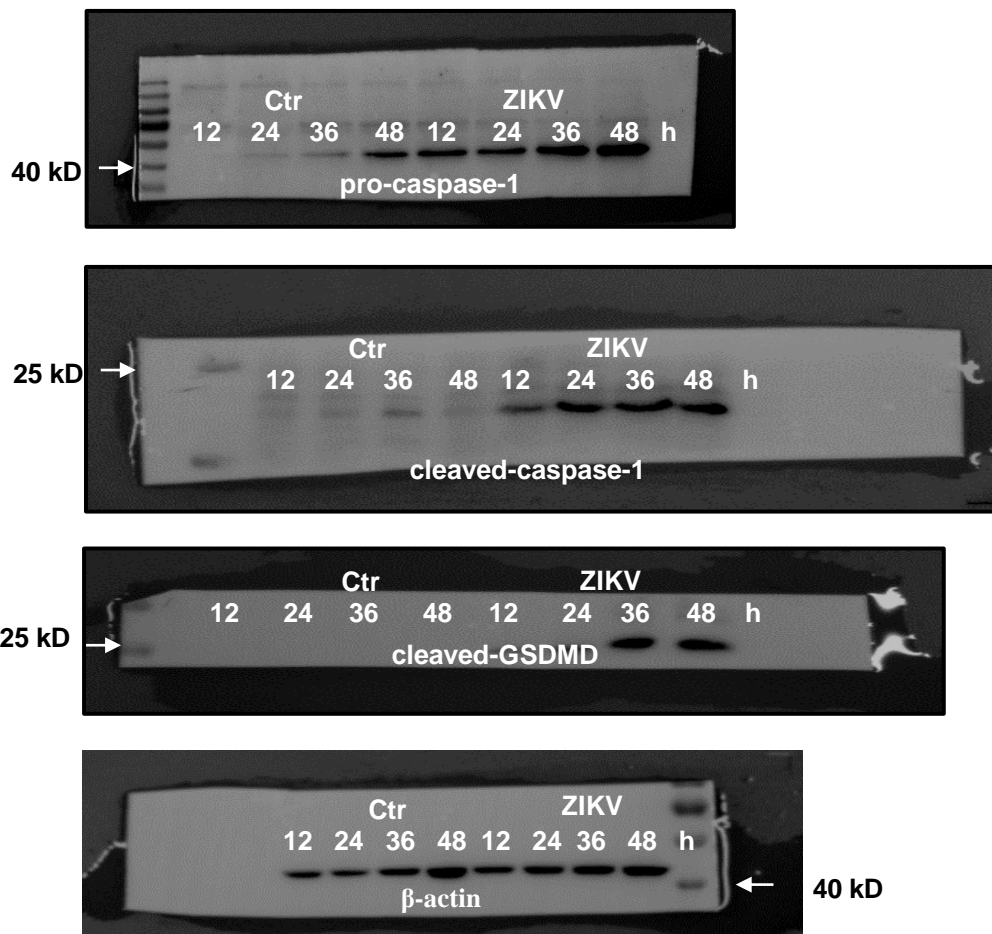

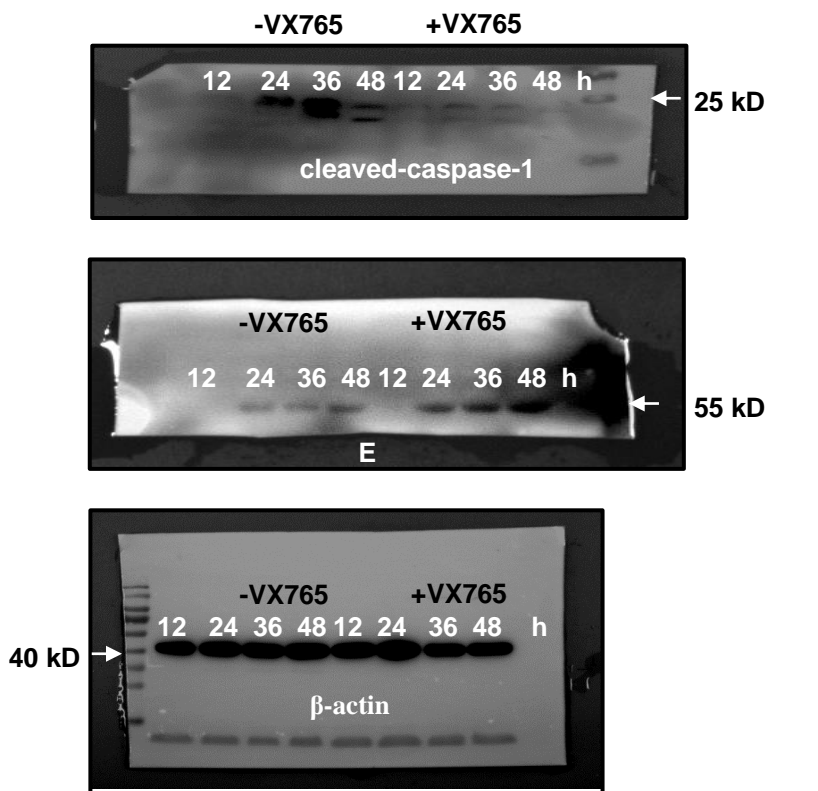

Figure 9A

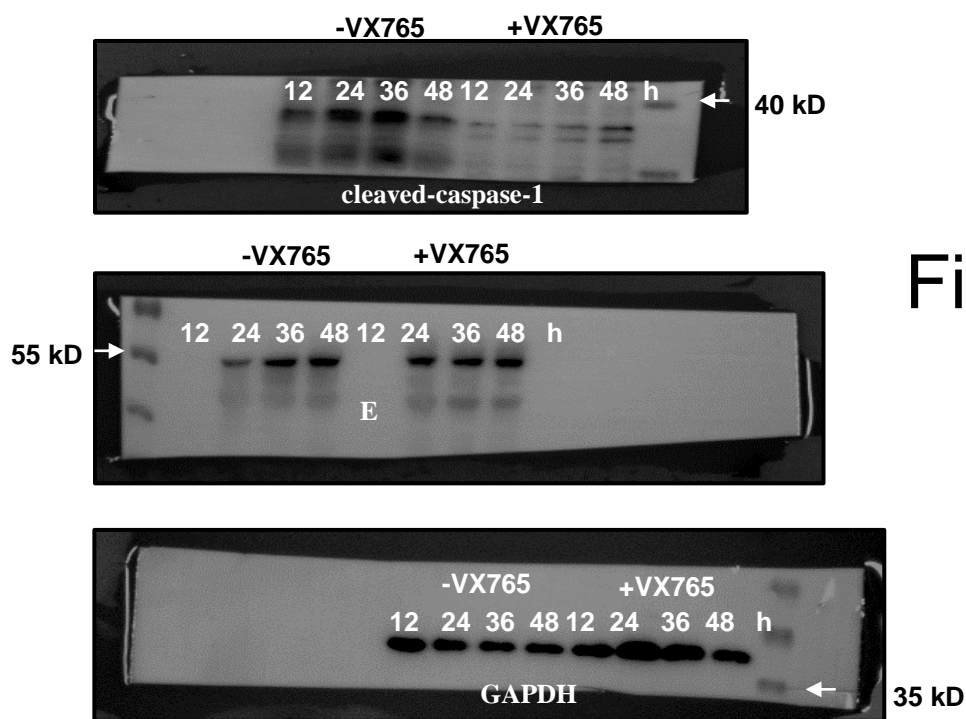

Figure 9B

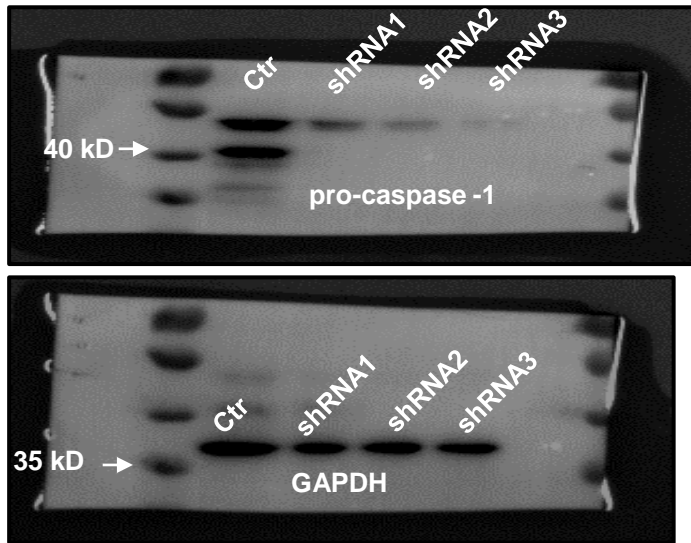

Figure 10A

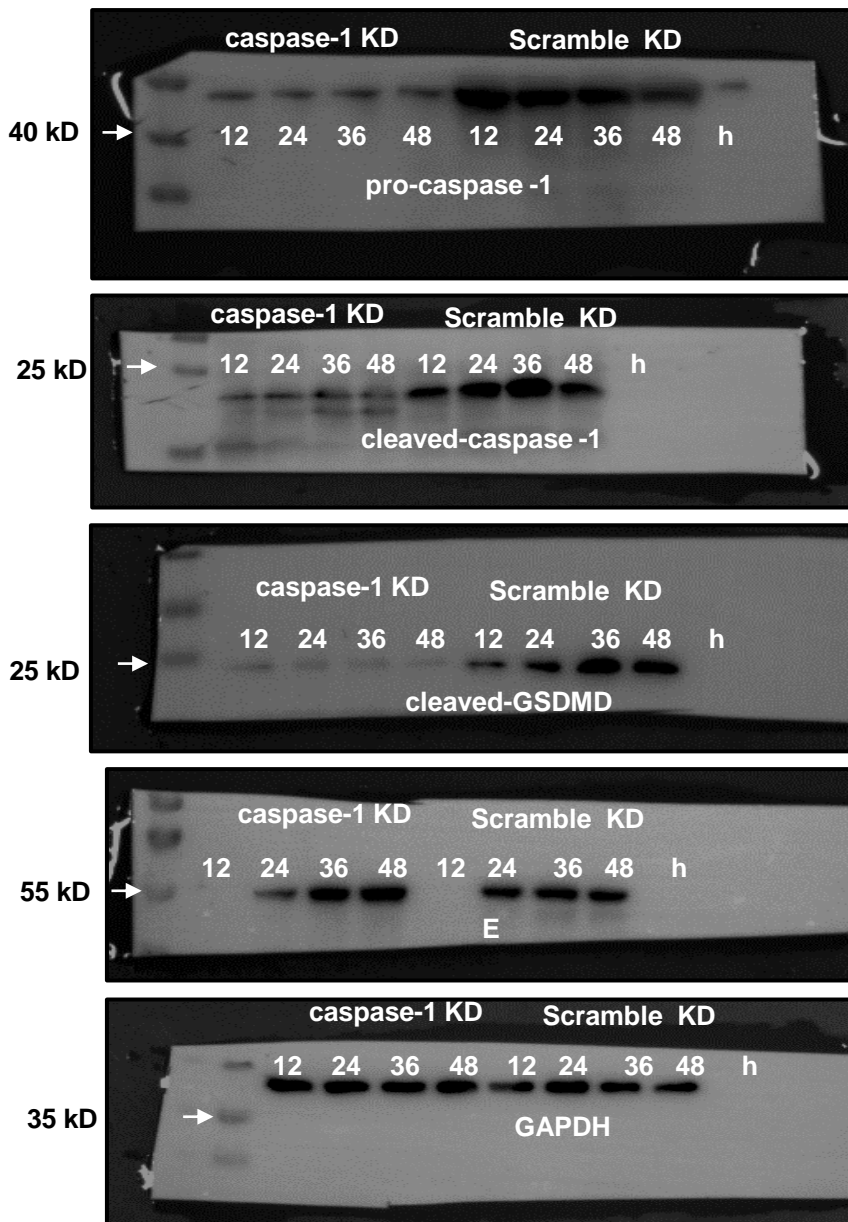

Figure 10B

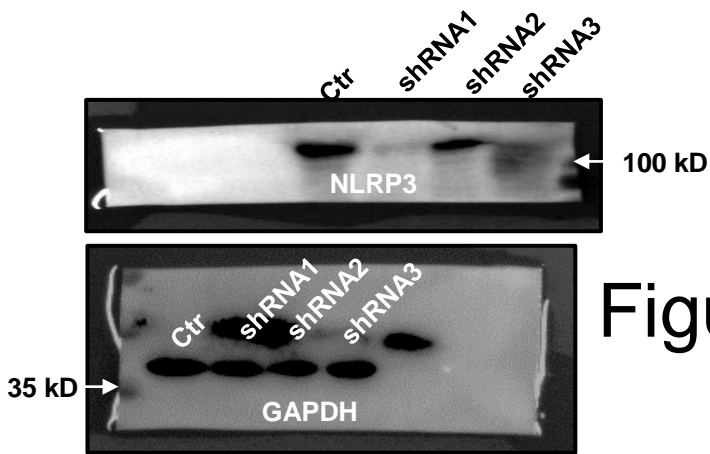

Figure 11A

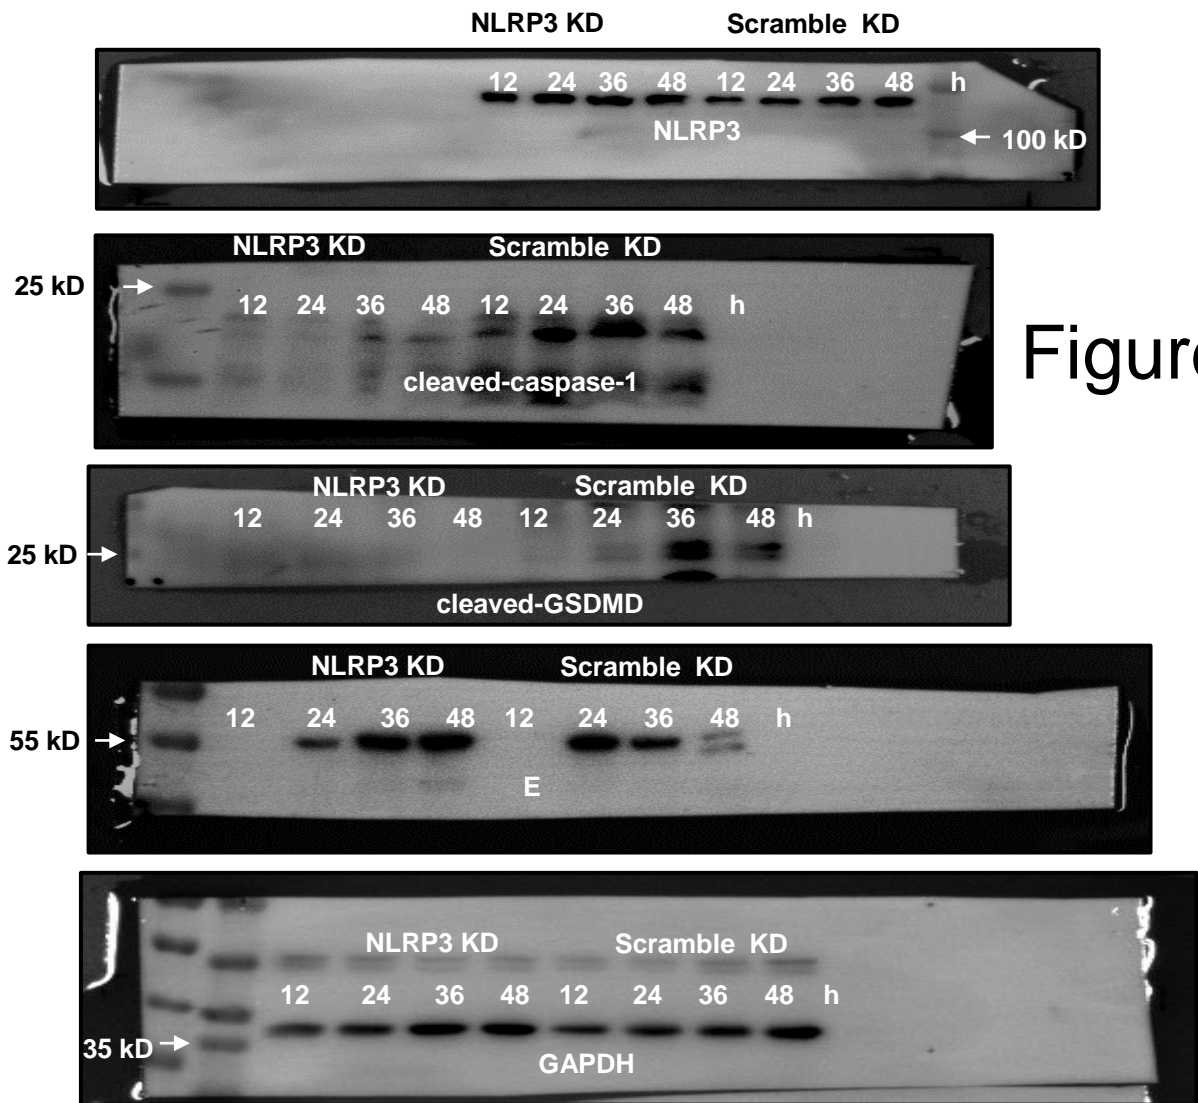

Figure 11B
